# Supplementary material
Source: HighWire-hosted journal article supplement (https://www.rcpjournals.org/highwire/filestream/11653/field_highwire_adjunct_files/0/Saqib_supplementary_material_S1.pdf)
Supplement: Saqib_supplementary_material_S1.pdf [file Saqib_supplementary_material_S1.pdf]

## Morning Board Round SOP

The Board Round is a **daily review** of **all patients** on the ward. The purpose is to improve **patient safety** and **patient journey** through the hospital by ensuring that **multidisciplinary plans** for all patients are clear, up to date and all staff understand their **responsibility** in relation to each patient's care plan. It does not replace the full medical conversation on the ward round.

|                         | Action to complete                                                                                                                                                                                                                                                                                                                                                                                                                                                                                                                                                                                                                                                                                                                                                                                                                                                                                                                                                                                                                                                                                                        |
|-------------------------|---------------------------------------------------------------------------------------------------------------------------------------------------------------------------------------------------------------------------------------------------------------------------------------------------------------------------------------------------------------------------------------------------------------------------------------------------------------------------------------------------------------------------------------------------------------------------------------------------------------------------------------------------------------------------------------------------------------------------------------------------------------------------------------------------------------------------------------------------------------------------------------------------------------------------------------------------------------------------------------------------------------------------------------------------------------------------------------------------------------------------|
| <b>Introduction</b>     | <ul style="list-style-type: none"> <li>• Hospital big picture (including Trust status)</li> <li>• Ward discharge targets</li> <li>• Patients TCI specific to program (DTAs, outliers, electives)</li> </ul>                                                                                                                                                                                                                                                                                                                                                                                                                                                                                                                                                                                                                                                                                                                                                                                                                                                                                                               |
| <b>For each patient</b> | <p><b>A: Clinical update</b></p> <ul style="list-style-type: none"> <li>○ Identify sick (e.g.: NEWS &gt; 5, patients deteriorated overnight)</li> <li>○ Summarise medical/nursing/therapy plans, and actions agreed by MDT</li> <li>○ Provide challenge and assign owners to escalate any delays (e.g. diagnostics)</li> </ul> <p><b>B: Discharge planning</b></p> <ul style="list-style-type: none"> <li>○ Ensure EDDs are set at admission, and checked daily</li> <li>○ Identify patients who are medically optimised and provide challenge for outstanding tasks</li> <li>○ Summarise discharge plan (location, actions required, timeline) with next steps and owner</li> <li>○ <b>Is this patient a discharge for today or tomorrow?</b> <ul style="list-style-type: none"> <li>➢ Identify actions required, with timeline and owners</li> <li>➢ Check patient suitability for criteria led discharge?</li> <li>➢ Can the patient be a golden patient?</li> <li>➢ Check patient suitability for community support (SMART, Home First?)</li> <li>➢ Check if EDN and TTOs have been completed?</li> </ul> </li> </ul> |
| <b>Summary</b>          | <ul style="list-style-type: none"> <li>• Sick and quick (golden patients for today) to see as a priority <ul style="list-style-type: none"> <li>○ Summary of number of discharges for today and tomorrow</li> </ul> </li> <li>• Review of actions required for discharges with priorities based on timelines <ul style="list-style-type: none"> <li>○ E.g. patient for Home First will require EDN to be completed in the morning</li> </ul> </li> <li>• Tasks that require escalations, with owners</li> <li>• Safety issues (including Duty of Candour)</li> </ul>                                                                                                                                                                                                                                                                                                                                                                                                                                                                                                                                                      |

## Afternoon Board Round SOP

The afternoon BR is a **follow up** of the patients (and associated actions) identified at the morning BR

|                         | Action to complete                                                                                                                                                                                                                                                                                                                                                                                                                                                                                                                                                                                           |
|-------------------------|--------------------------------------------------------------------------------------------------------------------------------------------------------------------------------------------------------------------------------------------------------------------------------------------------------------------------------------------------------------------------------------------------------------------------------------------------------------------------------------------------------------------------------------------------------------------------------------------------------------|
| <b>Introduction</b>     | <ul style="list-style-type: none"> <li>• Hospital 'big picture' and further updates from site meetings</li> <li>• Summarise total queries and definites identified in the morning</li> </ul>                                                                                                                                                                                                                                                                                                                                                                                                                 |
| <b>For each patient</b> | <p><b>Have the actions identified this morning been completed?</b></p> <ul style="list-style-type: none"> <li>○ If not, why haven't they been completed?</li> <li>○ Is this patient now ready to go? If not, can any of the pending tasks be completed today?</li> </ul> <p><b>Do any actions require escalation at site meetings?</b></p> <ul style="list-style-type: none"> <li>○ Are there any discharge dependent tasks?</li> </ul> <p><b>Are there any patients suitable for discharge tomorrow?</b></p> <ul style="list-style-type: none"> <li>○ If so, can any of them be golden patients?</li> </ul> |
| <b>Summary</b>          | <ul style="list-style-type: none"> <li>• Number of discharges for today and tomorrow</li> </ul>                                                                                                                                                                                                                                                                                                                                                                                                                                                                                                              |

## Morning Board Round: Checklist

|                                             | Action to complete                                                                                                                                                                                                                                                                                                                                                                                                                                                                                                                                                                                                                                                                                                      |
|---------------------------------------------|-------------------------------------------------------------------------------------------------------------------------------------------------------------------------------------------------------------------------------------------------------------------------------------------------------------------------------------------------------------------------------------------------------------------------------------------------------------------------------------------------------------------------------------------------------------------------------------------------------------------------------------------------------------------------------------------------------------------------|
| <b>Introduction</b>                         | <ul style="list-style-type: none"> <li>Hospital 'big picture' update</li> </ul>                                                                                                                                                                                                                                                                                                                                                                                                                                                                                                                                                                                                                                         |
| <b>For each patient</b>                     | <p><b>Clinical update</b></p> <ul style="list-style-type: none"> <li>What is the patient's medical, nursing and therapy plan?</li> <li><u>What actions need completing?</u> <ul style="list-style-type: none"> <li>What can be completed today? If nothing is happening today, why not?</li> </ul> </li> </ul> <p><b>Discharge Planning</b></p> <ul style="list-style-type: none"> <li>Does the patient have an up to date EDD?</li> <li>What is the patients social history?</li> <li>Does the patient require any social assessments or care needs following discharge?</li> <li>For medically fit patients, what actions require completion prior to discharge? (e.g.: EDNs, TTOs, transport, inform NOK)</li> </ul> |
| <b>Accountability and timely completion</b> | <ol style="list-style-type: none"> <li>Is there an <b>owner assigned</b> to every action?</li> <li>Are there any actions that <b>require escalation</b>? If so, who will do this?</li> <li>Does every action have a <b>timeframe</b> within which to complete?</li> </ol>                                                                                                                                                                                                                                                                                                                                                                                                                                               |
| <b>Summary</b>                              | <ul style="list-style-type: none"> <li>Patients to be prioritised (sick and quick)</li> <li>Number of discharges for today and tomorrow</li> </ul>                                                                                                                                                                                                                                                                                                                                                                                                                                                                                                                                                                      |

## Afternoon Board Round: Checklist

|                         | Action to complete                                                                                                                                                                                                                                                                                                                                                                                                                                                                                                                          |
|-------------------------|---------------------------------------------------------------------------------------------------------------------------------------------------------------------------------------------------------------------------------------------------------------------------------------------------------------------------------------------------------------------------------------------------------------------------------------------------------------------------------------------------------------------------------------------|
| <b>Introduction</b>     | <ul style="list-style-type: none"> <li>Hospital 'big picture' update</li> <li>Total queries and definites identified in the morning</li> </ul>                                                                                                                                                                                                                                                                                                                                                                                              |
| <b>For each patient</b> | <p><b>Have the actions identified this morning been completed?</b></p> <ul style="list-style-type: none"> <li>If not, why haven't they been completed?</li> <li>Is this patient now ready to go?</li> </ul> <p><b>Do any actions require escalation at site meetings?</b></p> <ul style="list-style-type: none"> <li>Are there any discharge dependent tasks?</li> </ul> <p><b>Are there any patients suitable for discharge tomorrow?</b></p> <ul style="list-style-type: none"> <li>If so, can any of them be golden patients?</li> </ul> |
| <b>Summary</b>          | <ul style="list-style-type: none"> <li>Number of discharges for today and tomorrow</li> </ul>                                                                                                                                                                                                                                                                                                                                                                                                                                               |
